# Supplementary material for: Association of Initial SARS-CoV-2 Test Positivity With Patient-Reported Well-being 3 Months After a Symptomatic Illness
Source: PubMed Central journal article supplement (PMC9716377; doi:10.1001/jamanetworkopen.2022.44486), 2022-12-01
Supplement: jamanetwopen-e2244486-s001.pdf [file jamanetwopen-e2244486-s001.pdf]

## Supplemental Online Content

Wisk LE, Gottlieb MA, Spatz ES, et al; INSPIRE Group. Association of initial SARS-CoV-2 test positivity with patient-reported well-being 3 months after a symptomatic illness. *JAMA Network Open*. 2022;5(12):e2244486. doi:10.1001/jamanetworkopen.2022.44486

**eAppendix.** Self-Reported Symptoms Suggestive of SARS-CoV-2 Infection

**eTable 1.** Comparison of Baseline Characteristics Among Responders vs Nonresponders to the 3-Month Survey

**eTable 2.** Sensitivity Analyses for Adjusted Associations Between COVID-19 Status and Difference (Between Baseline and Follow-up) in Patient-Reported Outcomes

**eFigure.** Unadjusted Prevalence of Moderate to Severe Scores on PROMIS Measures at Baseline and 3-Month Follow-up for Participants With Positive vs Negative COVID-19 Test Results

This supplemental material has been provided by the authors to give readers additional information about their work.

**eAppendix.** Self-Reported Symptoms Suggestive of SARS-CoV-2 Infection

Fever  
Chills  
Myalgia (muscle aches)  
Headache  
Sore throat  
Nausea or vomiting  
Diarrhea  
Fatigue (tiredness)  
Congestion or runny nose  
Cough  
Shortness of breath  
Difficulty breathing  
New loss of taste or smell

**eTable 1.** Comparison of Baseline Characteristics Among Responders vs Nonresponders to the 3-Month Survey

|                                              | <b>Total</b>  | <b>Responder</b> | <b>Non-responder</b> | <b>p-value</b> |
|----------------------------------------------|---------------|------------------|----------------------|----------------|
|                                              | <b>N (%)</b>  | <b>N (%)</b>     | <b>N (%)</b>         |                |
| <b>Total N</b>                               | 1423 (100.0%) | 1000 (70.3%)     | 423 (29.7%)          |                |
| <b><u>Sociodemographics</u></b>              |               |                  |                      |                |
| <b>Age (at enrollment)</b>                   |               |                  |                      | <.001          |
| 18 to 34                                     | 544 (38.3%)   | 406 (40.7%)      | 138 (32.6%)          |                |
| 35 to 49                                     | 396 (27.9%)   | 286 (28.7%)      | 110 (26.0%)          |                |
| 50 to 64                                     | 333 (23.4%)   | 215 (21.5%)      | 118 (27.9%)          |                |
| 65+                                          | 148 (10.4%)   | 91 (9.1%)        | 57 (13.5%)           |                |
| <b>Gender</b>                                |               |                  |                      | 0.07           |
| Female                                       | 903 (64.8%)   | 644 (66.3%)      | 259 (61.5%)          |                |
| Male                                         | 472 (33.9%)   | 313 (32.2%)      | 159 (37.8%)          |                |
| Transgender/Non-binary/Other                 | 18 (1.3%)     | 15 (1.5%)        | 3 (0.7%)             |                |
| <b>Ethnicity</b>                             |               |                  |                      | 0.16           |
| Hispanic, Latin or Spanish origin            | 203 (14.5%)   | 151 (15.3%)      | 52 (12.5%)           |                |
| Not of Hispanic, Latin or Spanish origin     | 1,198 (85.5%) | 833 (84.7%)      | 365 (87.5%)          |                |
| <b>Race<sup>a</sup></b>                      |               |                  |                      | <.001          |
| Asian/Native Hawaiian/Other Pacific Islander | 106 (7.7%)    | 89 (9.1%)        | 17 (4.2%)            |                |
| Black or African American                    | 285 (20.6%)   | 131 (13.4%)      | 154 (37.7%)          |                |
| White                                        | 895 (64.7%)   | 685 (70.3%)      | 210 (51.3%)          |                |
| Other/Multiple                               | 97 (7.0%)     | 69 (7.1%)        | 28 (6.8%)            |                |
| <b>Educational Attainment</b>                |               |                  |                      | <.001          |
| Less than high school diploma                | 41 (3.0%)     | 17 (1.8%)        | 24 (5.8%)            |                |
| High school graduate or GED                  | 222 (16.1%)   | 106 (11.0%)      | 116 (28.2%)          |                |
| 2-year college degree                        | 124 (9.0%)    | 87 (9.0%)        | 37 (9.0%)            |                |
| 4-year college degree                        | 385 (28.0%)   | 290 (30.0%)      | 95 (23.1%)           |                |
| More than 4-year college degree              | 390 (28.3%)   | 317 (32.8%)      | 73 (17.8%)           |                |
| Some college but did not complete degree     | 215 (15.6%)   | 149 (15.4%)      | 66 (16.1%)           |                |
| <b>Marital Status</b>                        |               |                  |                      | 0.37           |
| Married/Living with a part                   | 702 (50.4%)   | 503 (51.5%)      | 199 (47.8%)          |                |

|                                               |              |             |             |       |
|-----------------------------------------------|--------------|-------------|-------------|-------|
| Divorced/Widowed/Separated                    | 189 (13.6%)  | 126 (12.9%) | 63 (15.1%)  |       |
| Never married                                 | 502 (36.0%)  | 348 (35.6%) | 154 (37.0%) |       |
| <b>Family Income (pre-pandemic)</b>           |              |             |             | <.001 |
| Less than \$10,000                            | 129 (9.3%)   | 70 (7.2%)   | 59 (14.3%)  |       |
| \$10,000 to \$35,000                          | 221 (15.9%)  | 132 (13.5%) | 89 (21.5%)  |       |
| \$35,000 to less than \$50,000                | 173 (12.4%)  | 124 (12.7%) | 49 (11.9%)  |       |
| \$50,000 to less than \$75,000                | 195 (14.0%)  | 126 (12.9%) | 69 (16.7%)  |       |
| \$75,000 or more                              | 616 (44.3%)  | 483 (49.3%) | 133 (32.2%) |       |
| Prefer not to answer                          | 58 (4.2%)    | 44 (4.5%)   | 14 (3.4%)   |       |
| <b>Health Insurance</b>                       |              |             |             | <.001 |
| Private & Public                              | 57 (4.1%)    | 42 (4.3%)   | 15 (3.6%)   |       |
| Private only                                  | 873 (62.4%)  | 663 (67.6%) | 210 (50.4%) |       |
| Public only                                   | 404 (28.9%)  | 240 (24.5%) | 164 (39.3%) |       |
| None                                          | 64 (4.6%)    | 36 (3.7%)   | 28 (6.7%)   |       |
| <b>Employment (pre-pandemic)</b>              |              |             |             | 0.001 |
| Employed, essential or health care worker     | 566 (40.6%)  | 409 (41.8%) | 157 (37.6%) |       |
| Employed, not essential or health care worker | 512 (36.7%)  | 373 (38.1%) | 139 (33.3%) |       |
| Not employed                                  | 317 (22.7%)  | 196 (20.0%) | 121 (29.0%) |       |
| <b>Clinical Characteristics</b>               |              |             |             |       |
| <b>Where received COVID test</b>              |              |             |             | <.001 |
| Hospital                                      | 250 (17.7%)  | 144 (14.5%) | 106 (25.1%) |       |
| Emergency department                          | 211 (14.9%)  | 90 (9.1%)   | 121 (28.7%) |       |
| Clinic including an Urgent Care Clinic        | 193 (13.6%)  | 143 (14.4%) | 50 (11.8%)  |       |
| Tent/drive-up testing site                    | 653 (46.1%)  | 526 (53.0%) | 127 (30.1%) |       |
| At home testing kit                           | 17 (1.2%)    | 15 (1.5%)   | 2 (0.5%)    |       |
| Other                                         | 91 (6.4%)    | 75 (7.6%)   | 16 (3.8%)   |       |
| <b>Reported symptoms at baseline</b>          |              |             |             |       |
| Any Systemic <sup>b</sup>                     | 1063 (74.7%) | 780 (78.0%) | 283 (66.9%) | <.001 |
| Any Musculoskeletal <sup>c</sup>              | 774 (54.4%)  | 572 (57.2%) | 202 (47.8%) | 0.001 |
| Any HEENT <sup>d</sup>                        | 1111 (78.1%) | 830 (83.0%) | 281 (66.4%) | <.001 |
| Any Pulmonary <sup>e</sup>                    | 826 (58.0%)  | 604 (60.4%) | 222 (52.5%) | 0.006 |
| Any Cardiovascular <sup>f</sup>               | 387 (27.2%)  | 273 (27.3%) | 114 (27.0%) | 0.89  |

|                                   |             |             |             |       |
|-----------------------------------|-------------|-------------|-------------|-------|
| Any Gastrointestinal <sup>g</sup> | 515 (36.2%) | 366 (36.6%) | 149 (35.2%) | 0.62  |
| Any Other                         | 141 (10.1%) | 115 (11.7%) | 26 (6.2%)   | 0.002 |

Proportions (%) and p-values were all calculated after excluding missingness.

For variables with cell expected values <5, p-values were estimated using Fisher exact method. Generally, the other p-values were estimated using Chi-square test.

- a. Participants self-reported race according to the following verbatim categories: American Indian/Alaska Native; Asian; Native Hawaiian/Other Pacific Islander; Black or African American; Some Other Race; More than one of the above; White
- b. Systemic symptoms include: fever > 100.4 F (38 C); Feeling hot or feverish; Chills; Repeated shaking with chills; More tired than usual
- c. Musculoskeletal symptoms include: Muscle aches; Joint Pains
- d. HEENT symptoms include: Runny Nose; Sore throat; Decrease smell or change in smell; Decrease taste or change in taste; Hair loss; Headache
- e. Pulmonary symptoms include: A new cough, or worsening of chronic cough; Shortness of breath; Wheezing
- f. Cardiovascular symptoms include: Pain or tightness in your chest; Palpitation
- g. Gastrointestinal symptoms include: Nausea or vomiting; Abdominal pain; Diarrhea (> 3 loose/looser than normal stool/ 24 hours)

**eTable 2.** Sensitivity Analyses for Adjusted Associations Between COVID-19 Status and Difference (Between Baseline and Follow-up) in Patient-Reported Outcomes

| $\beta$ (95% CI) <sup>a</sup>        | <i>Tested in ED/Hospital</i> | <i>Tested in Clinic/Drive up/At home/Other</i> | <i>Ages 18-34</i>    | <i>Ages 35-49</i>   | <i>Ages 50+</i>      |
|--------------------------------------|------------------------------|------------------------------------------------|----------------------|---------------------|----------------------|
| <b>Cognitive Function</b>            | -0.90 (-3.69, 1.88)          | 3.33 (1.45, 5.22)                              | 2.91 (0.85, 4.97)    | 1.14 (-1.65, 3.93)  | 1.42 (-0.98, 3.83)   |
| <b>Physical Function<sup>c</sup></b> | 0.28 (-2.16, 2.73)           | 3.01 (1.54, 4.48)                              | 2.02 (0.49, 3.55)    | 0.40 (-1.82, 2.61)  | 2.49 ( 0.38, 4.59)   |
| <b>Social Participation</b>          | 0.20 (-3.00, 3.40)           | 4.16 (2.12, 6.20)                              | 3.90 (1.75, 6.05)    | 2.93 (-0.20, 6.05)  | 2.72 (-0.09, 5.53)   |
| <b>Anxiety</b>                       | 0.61 (-1.67, 2.90)           | -2.04 (-3.77, -0.31)                           | -1.66 (-3.56, 0.24)  | -1.04 (-3.49, 1.41) | -1.12 (-3.32, 1.08)  |
| <b>Depression</b>                    | 0.10 (-2.03, 2.22)           | -1.49 (-3.01, 0.04)                            | -1.70 (-3.41, -0.00) | 0.09 (-2.12, 2.29)  | -0.94 (-2.81, 0.92)  |
| <b>Fatigue</b>                       | -0.77 (-3.16, 1.62)          | -2.48 (-4.39, -0.57)                           | -1.81 (-3.92, 0.30)  | -0.58 (-3.06, 1.91) | -3.39 (-5.84, -0.94) |
| <b>Sleep Disturbance</b>             | -0.40 (-1.69, 0.89)          | -0.84 (-1.74, 0.06)                            | -0.44 (-1.39, 0.51)  | -1.24 (-2.51, 0.02) | -0.67 (-1.89, 0.56)  |
| <b>Pain Interference</b>             | 0.40 (-2.08, 2.89)           | -1.95 (-3.51, -0.40)                           | -1.96 (-3.52, -0.40) | -0.16 (-2.67, 2.34) | -2.10 (-4.17, -0.02) |
| <b>Pain Intensity</b>                | -0.17 (-0.89, 0.55)          | -0.72 (-1.11, -0.33)                           | -1.05 (-1.48, -0.63) | 0.11 (-0.52, 0.73)  | -0.42 (-0.97, 0.12)  |

a. Coefficients for COVID + vs. COVID – participants (primary exposure) are shown for all models, where difference in patient-reported outcomes (e.g., physical function) over time (baseline vs follow-up) is the primary outcome. All models are adjusted for demographics (age and race), social factors (marital status, income, employment, health insurance), health conditions (asthma, diabetes, and hypertension), and baseline T-score. A within-person (i.e., over time) difference in pain intensity of  $\geq 1$  is considered to be clinically significant while for all other measures, an absolute difference of  $\geq 2$  is considered to be clinically significant. Positive difference for physical function, social participation, and cognitive function are indicative of greater improvement among COVID + vs. COVID – participants while negative difference in scores for all other measures are indicative of greater improvement for COVID + vs. COVID – participants. In both cases, confidence intervals inclusive of zero (0) indicate that difference over time for COVID + vs. COVID – participants are statistically similar at  $p \geq 0.05$ .

**eFigure.** Unadjusted Prevalence of Moderate to Severe Scores on PROMIS Measures at Baseline and 3-Month Follow-up for Participants With Positive vs Negative COVID-19 Test Results

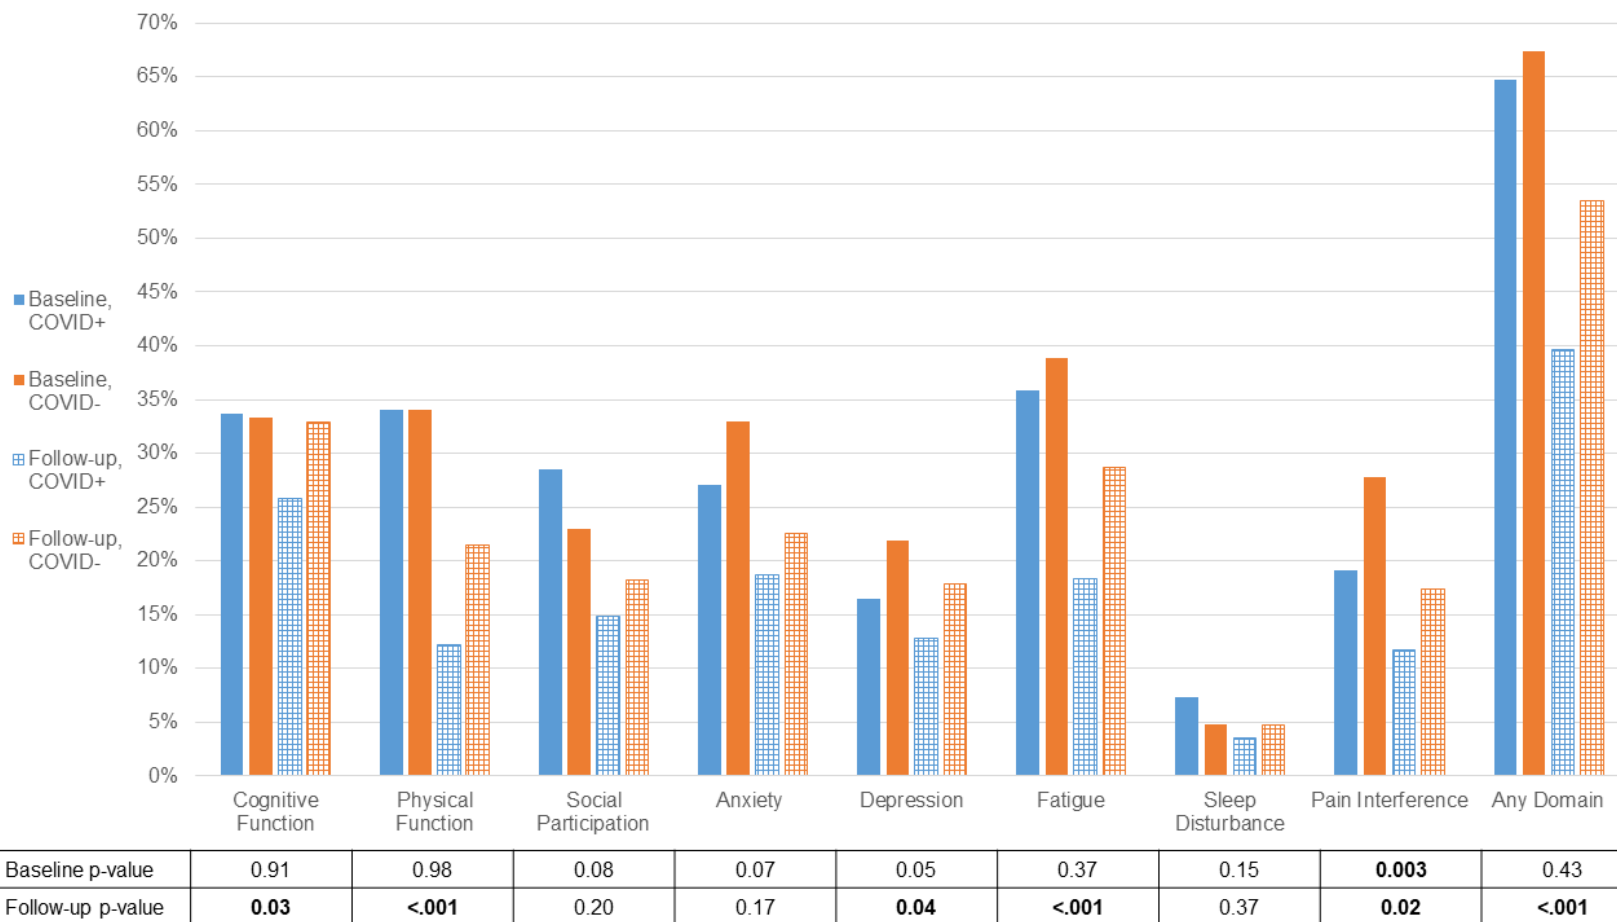

PROMIS includes PROMIS-29 v2.1 and PROMIS Short Form-Cognitive Function (SF-CF 8a) questions. Prevalence of moderate/severe scores for each PROMIS domain and across any domain are shown for COVID+ (in blue) and COVID - (in orange) participants at baseline (solid bars) and follow-up (hashed bars). P-values compare differences in the prevalence by COVID status at each time point. For physical function, social participation, and cognitive function (where higher scores are better): scores <40 represent moderate to severe impairment. For anxiety, depression, fatigue, sleep disturbance, and pain interference (where lower scores are better) scores ≥60 represent moderate to severe impairment.
