# Supplementary material for: Association of Initial SARS-CoV-2 Test Positivity With Patient-Reported Well-being 3 Months After a Symptomatic Illness
Source: PubMed Central journal article supplement (PMC9716377; doi:10.1001/jamanetworkopen.2022.44486), 2022-12-01
Supplement: jamanetwopen-e2244486-s002.pdf [file jamanetwopen-e2244486-s002.pdf]

## Supplemental Online Content: Nonauthor Collaborators

\*First name, last name, and suffix (if applicable) are required and will appear in PubMed.

| <b>*Group Name(s): The INSPIRE Group</b> |                   |                              |                  |                          |                                          |                                                         |                                                                                            |
|------------------------------------------|-------------------|------------------------------|------------------|--------------------------|------------------------------------------|---------------------------------------------------------|--------------------------------------------------------------------------------------------|
| <b>*First Name and Middle Initial(s)</b> | <b>*Last Name</b> | <b>*Suffix (eg, Jr, III)</b> | Academic Degrees | Institution              | Location (city, state/province, country) | Role or Contribution, eg, chair, principal investigator | Group (if more than 1 Group listed in the byline) and/or Subgroup (eg, Steering Committee) |
| Michelle                                 | Santangelo        |                              | MS               | Rush University          | Chicago, Illinois, USA                   | Clinical Research Coordinator                           | INSPIRE Group                                                                              |
| Andrew                                   | Ulrich            |                              | MD               | Yale University          | New Haven, Connecticut, USA              | Co-Investigator                                         | INSPIRE Group                                                                              |
| Shu-Xia                                  | Li                |                              | PhD              | Yale University          | New Haven, Connecticut, USA              | Co-Investigator                                         | INSPIRE Group                                                                              |
| Jeremiah                                 | Kinsman           |                              | MPH              | Yale University          | New Haven, Connecticut, USA              | Project Manager                                         | INSPIRE Group                                                                              |
| Harlan                                   | Krumholz          |                              | MD SM            | Yale University          | New Haven, Connecticut, USA              | Co-Investigator                                         | INSPIRE Group                                                                              |
| Jocelyn                                  | Dorney            |                              | MPH              | Yale University          | New Haven, Connecticut, USA              | Research Associate                                      | INSPIRE Group                                                                              |
| Kari A                                   | Stephens          |                              | PhD              | University of Washington | Seattle, Washington, USA                 | Co-Principal Investigator                               | INSPIRE Group                                                                              |
| Kari                                     | Black             |                              | BA               | University of Washington | Seattle, Washington, USA                 | Grants & Finance Manager                                | INSPIRE Group                                                                              |
| Dana                                     | Morse             |                              | RN BSN           | University of Washington | Seattle, Washington, USA                 | Research Coordinator                                    | INSPIRE Group                                                                              |
| Sophie                                   | Morse             |                              | BSc              | University of Washington | Seattle, Washington, USA                 | Research Assistant                                      | INSPIRE Group                                                                              |
| Anoushka                                 | Fernandes         |                              | BSc              | University of Washington | Seattle, Washington, USA                 | Research Assistant                                      | INSPIRE Group                                                                              |
| Abhishek                                 | Sharma            |                              | BS MS<br>MScS    | University of Washington | Seattle, Washington, USA                 | Research Assistant                                      | INSPIRE Group                                                                              |
| Tracy                                    | Stober            |                              | BA MA            | University of Washington | Seattle, Washington, USA                 | Patient Representative                                  | INSPIRE Group                                                                              |
| Rachel E                                 | Geyer             |                              | MPH              | University of Washington | Seattle, Washington, USA                 | Research Coordinator                                    | INSPIRE Group                                                                              |

## Supplemental Online Content: Nonauthor Collaborators

\*First name, last name, and suffix (if applicable) are required and will appear in PubMed.

| *First Name and Middle Initial(s) | *Last Name | *Suffix (eg, Jr, III) | Academic Degrees  | Institution                 | Location (city, state/province, country) | Role or Contribution, eg, chair, principal investigator | Group (if more than 1 Group listed in the byline) and/or Subgroup (eg, Steering Committee) |
|-----------------------------------|------------|-----------------------|-------------------|-----------------------------|------------------------------------------|---------------------------------------------------------|--------------------------------------------------------------------------------------------|
| Victoria                          | Lyon       |                       | MPH               | University of Washington    | Seattle, Washington, USA                 | Program Manager                                         | INSPIRE Group                                                                              |
| Karen                             | Adams      |                       | BA                | University of Washington    | Seattle, Washington, USA                 | Regulatory Specialist                                   | INSPIRE Group                                                                              |
| Michael                           | Willis     |                       | AS BSHS           | University of Washington    | Seattle, Washington, USA                 | Research Assistant                                      | INSPIRE Group                                                                              |
| Luis                              | Ruiz       |                       | BA                | University of Washington    | Seattle, Washington, USA                 | Research Assistant                                      | INSPIRE Group                                                                              |
| Jasmine                           | Park       |                       | N/A (in progress) | University of Washington    | Seattle, Washington, USA                 | Research Assistant                                      | INSPIRE Group                                                                              |
| Kerry                             | Malone     |                       | BA                | University of Washington    | Seattle, Washington, USA                 | Research Assistant                                      | INSPIRE Group                                                                              |
| Hailey                            | Shughart   |                       | BA CCRP           | Thomas Jefferson University | Philadelphia, Pennsylvania, USA          | Research Coordinator                                    | INSPIRE Group                                                                              |
| Kevin W                           | Schaeffer  |                       | BS                | Thomas Jefferson University | Philadelphia, Pennsylvania, USA          | Research Coordinator                                    | INSPIRE Group                                                                              |
| Lindsey A                         | Shughart   |                       | BS                | Thomas Jefferson University | Philadelphia, Pennsylvania, USA          | Research Coordinator                                    | INSPIRE Group                                                                              |
| Abir I                            | Arab       |                       | BSc               | Thomas Jefferson University | Philadelphia, Pennsylvania, USA          | Research Coordinator                                    | INSPIRE Group                                                                              |
| Dylan T                           | Grau       |                       | BS                | Thomas Jefferson University | Philadelphia, Pennsylvania, USA          | Research Coordinator                                    | INSPIRE Group                                                                              |
| Ashini                            | Patel      |                       | BS                | Thomas Jefferson University | Philadelphia, Pennsylvania, USA          | Research Coordinator                                    | INSPIRE Group                                                                              |
| Phillip B                         | Watts      |                       | BA MM CCRP        | Thomas Jefferson University | Philadelphia, Pennsylvania, USA          | Research Coordinator                                    | INSPIRE Group                                                                              |
| Morgan                            | Kelly      |                       | BS                | Thomas Jefferson University | Philadelphia, Pennsylvania, USA          | Research Coordinator                                    | INSPIRE Group                                                                              |
| Alaina                            | Hunt       |                       | BA                | Thomas Jefferson University | Philadelphia, Pennsylvania, USA          | Research Coordinator                                    | INSPIRE Group                                                                              |

## Supplemental Online Content: Nonauthor Collaborators

\*First name, last name, and suffix (if applicable) are required and will appear in PubMed.

| *First Name and Middle Initial(s) | *Last Name  | *Suffix (eg, Jr, III) | Academic Degrees | Institution                                          | Location (city, state/province, country) | Role or Contribution, eg, chair, principal investigator | Group (if more than 1 Group listed in the byline) and/or Subgroup (eg, Steering Committee) |
|-----------------------------------|-------------|-----------------------|------------------|------------------------------------------------------|------------------------------------------|---------------------------------------------------------|--------------------------------------------------------------------------------------------|
| Paavali                           | Hannikainen |                       | BS               | Thomas Jefferson University                          | Philadelphia, Pennsylvania, USA          | Medical Student                                         | INSPIRE Group                                                                              |
| Melanie                           | Chalfin     |                       | BA               | Thomas Jefferson University                          | Philadelphia, Pennsylvania, USA          | Research Coordinator                                    | INSPIRE Group                                                                              |
| David                             | Cheng       |                       | BS               | Thomas Jefferson University                          | Philadelphia, Pennsylvania, USA          | Research Coordinator                                    | INSPIRE Group                                                                              |
| Jessica                           | Miao        |                       | BA               | Thomas Jefferson University                          | Philadelphia, Pennsylvania, USA          | Research Coordinator                                    | INSPIRE Group                                                                              |
| Carly                             | Shutty      |                       | BSN              | Thomas Jefferson University                          | Philadelphia, Pennsylvania, USA          | Clinical Research Nurse                                 | INSPIRE Group                                                                              |
| Summer                            | Chavez      |                       | DO MPH<br>MPM    | University of Texas Health Science Center at Houston | Houston, Texas, USA                      | Co-Investigator                                         | INSPIRE Group                                                                              |
| Arun                              | Kane        |                       | BA               | University of Texas Health Science Center at Houston | Houston, Texas, USA                      | Research Coordinator                                    | INSPIRE Group                                                                              |
| Prasen                            | Marella     |                       | MBBS<br>MPH      | University of Texas Health Science Center at Houston | Houston, Texas, USA                      | Research Coordinator                                    | INSPIRE Group                                                                              |
| Guillermo D                       | Gallegos    |                       | BA               | University of Texas Southwestern Medical Center      | Dallas, Texas, USA                       | Research Coordinator                                    | INSPIRE Group                                                                              |
| Katherine R                       | Martin      |                       | MS               | University of Texas Southwestern Medical Center      | Dallas, Texas, USA                       | Research Associate                                      | INSPIRE Group                                                                              |
| Michelle                          | L'Hommedieu |                       | PhD              | University of California, Los Angeles                | Los Angeles, California, USA             | Project Director                                        | INSPIRE Group                                                                              |
| Christopher W                     | Chandler    |                       | BA               | University of California, Los Angeles                | Los Angeles, California, USA             | Research Assistant                                      | INSPIRE Group                                                                              |
| Kate                              | Diaz Roldan |                       | MPH              | University of California, Los Angeles                | Los Angeles, California, USA             | Research Assistant                                      | INSPIRE Group                                                                              |
| Nicole                            | Villegas    |                       | BS               | University of California, Los Angeles                | Los Angeles, California, USA             | Research Assistant                                      | INSPIRE Group                                                                              |
| Raul                              | Moreno      |                       | BA               | University of California, Los Angeles                | Los Angeles, California, USA             | Administrative Analyst                                  | INSPIRE Group                                                                              |

## Supplemental Online Content: Nonauthor Collaborators

\*First name, last name, and suffix (if applicable) are required and will appear in PubMed.

| *First Name and Middle Initial(s) | *Last Name   | *Suffix (eg, Jr, III) | Academic Degrees  | Institution                                      | Location (city, state/province, country) | Role or Contribution, eg, chair, principal investigator | Group (if more than 1 Group listed in the byline) and/or Subgroup (eg, Steering Committee) |
|-----------------------------------|--------------|-----------------------|-------------------|--------------------------------------------------|------------------------------------------|---------------------------------------------------------|--------------------------------------------------------------------------------------------|
| Megan                             | Eguchi       |                       | MPH               | University of California, Los Angeles            | Los Angeles, California, USA             | Programmer Analyst                                      | INSPIRE Group                                                                              |
| Robert                            | Rodriguez    |                       | MD                | University of California, San Francisco          | San Francisco, California, USA           | Co-Principal Investigator                               | INSPIRE Group                                                                              |
| Robin                             | Kemball      |                       | MPH               | University of California, San Francisco          | San Francisco, California, USA           | Research Manager                                        | INSPIRE Group                                                                              |
| Virginia                          | Chan         |                       | BS                | University of California, San Francisco          | San Francisco, California, USA           | Clinical Research Coordinator                           | INSPIRE Group                                                                              |
| Cecilia L                         | Chavez       |                       | N/A (in progress) | University of California, San Francisco          | San Francisco, California, USA           | Clinical Research Coordinator                           | INSPIRE Group                                                                              |
| Angela                            | Wong         |                       | BA                | University of California, San Francisco          | San Francisco, California, USA           | Clinical Research Coordinator                           | INSPIRE Group                                                                              |
| Aron J                            | Hall         |                       | DVM<br>MSPH       | Centers for Disease Control and Prevention (CDC) | Atlanta, Georgia, USA                    | Co-Investigator                                         | INSPIRE Group                                                                              |
| Melissa                           | Briggs-Hagen |                       | MD MPH            | Centers for Disease Control and Prevention (CDC) | Atlanta, Georgia, USA                    | Co-Investigator                                         | INSPIRE Group                                                                              |
