# Supplementary material for: Association of Initial SARS-CoV-2 Test Positivity With Patient-Reported Well-being 3 Months After a Symptomatic Illness
Source: PubMed Central journal article supplement (PMC9716377; doi:10.1001/jamanetworkopen.2022.44486), 2022-12-01
Supplement: jamanetwopen-e2244486-s003.pdf [file jamanetwopen-e2244486-s003.pdf]

## Data Sharing Statement

Wisk. Association of Initial SARS-CoV-2 Test Positivity With Patient-Reported Well-being 3 Months After a Symptomatic Illness. *JAMA Netw Open*. Published December 01, 2022. doi:10.1001/jamanetworkopen.2022.44486

### Data

**Data available:** No
